# Supplementary material
Source: PubMed Central journal article supplement (PMC5400709)
Supplement: NIHMS832619-supplement-Supp_FigS2.pdf [file NIHMS832619-supplement-Supp_FigS2.pdf]

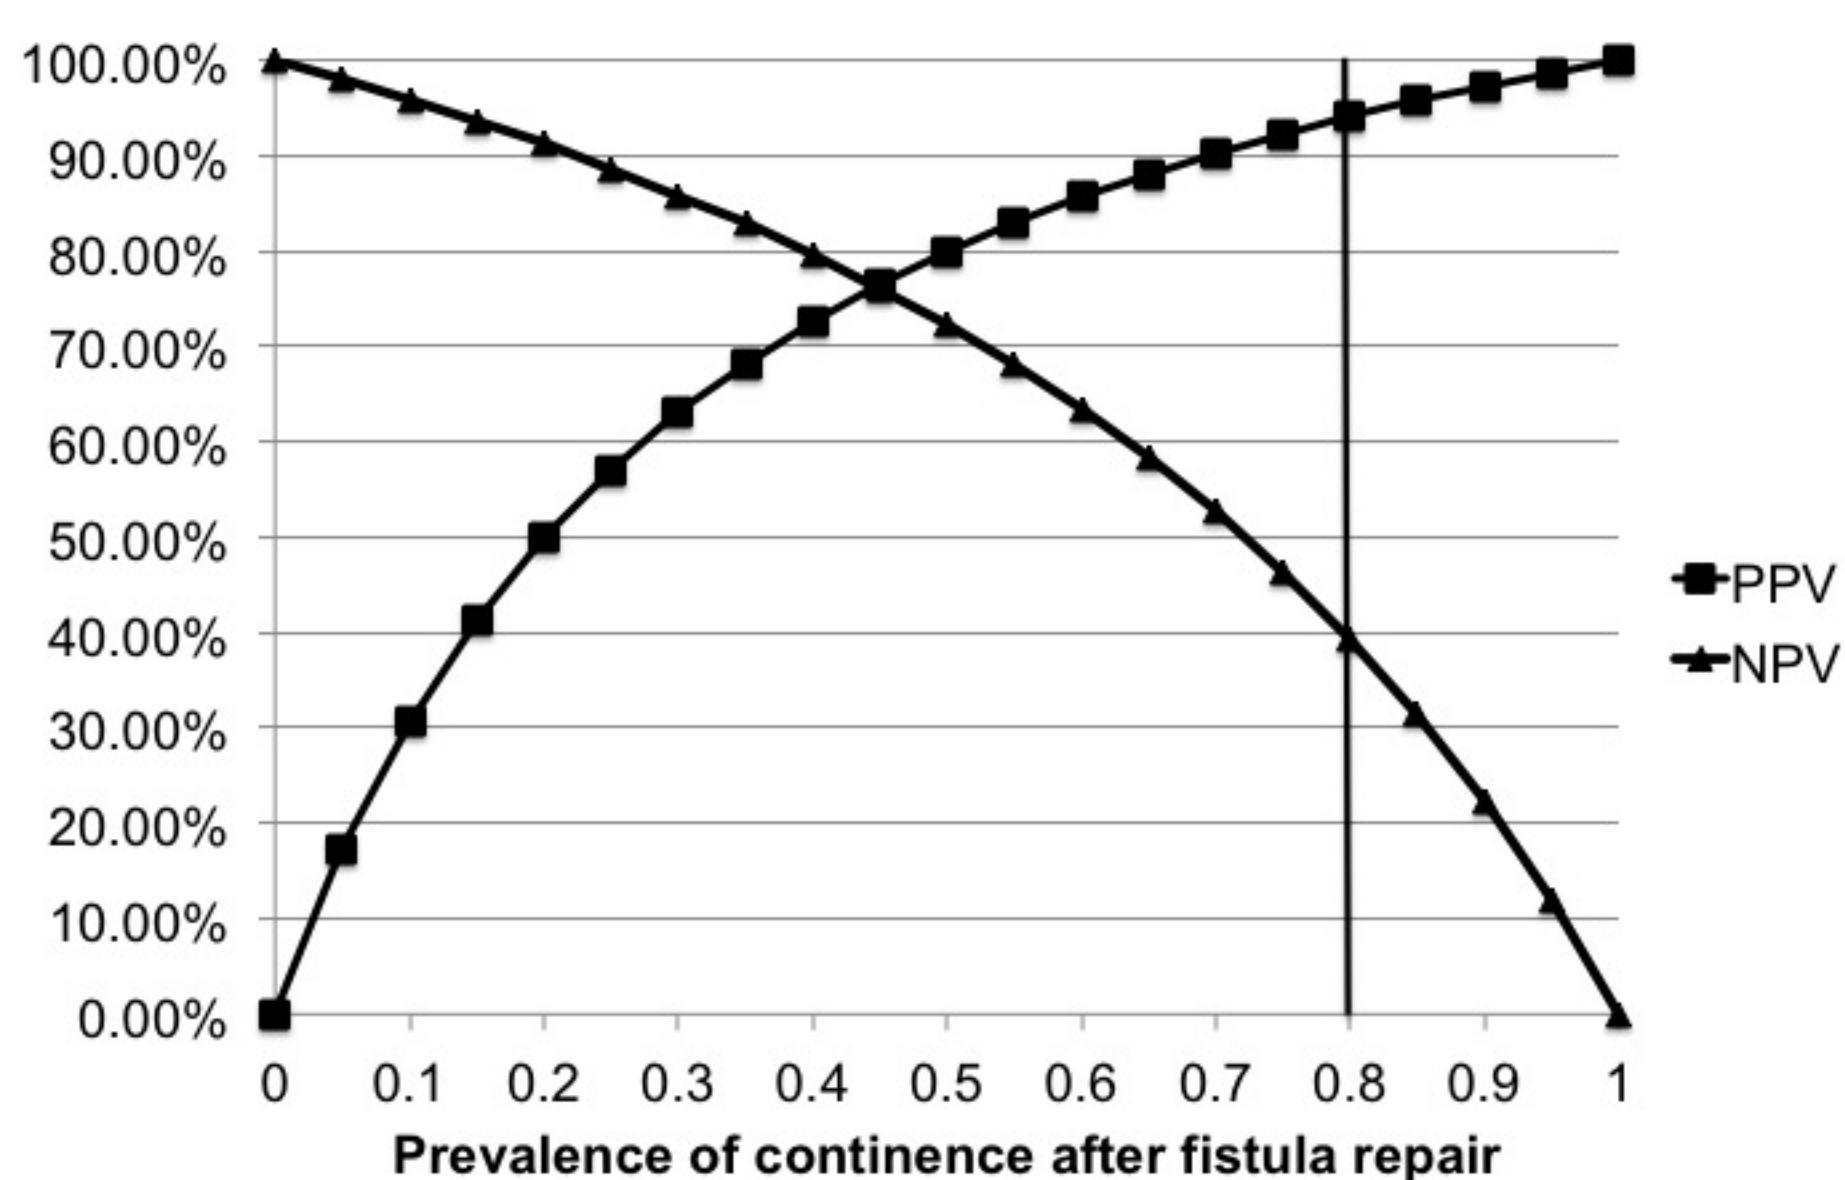

Figure S2: Positive predictive value and negative predictive value for 1-hour pad test at 1.5 gram threshold, by prevalence. The reference line at 79.8% indicates the prevalence of continence in the study population.
