# Supplementary material
Source: PubMed Central journal article supplement (PMC5400709)
Supplement: NIHMS832619-supplement-Supp_TableS1.pdf [file NIHMS832619-supplement-Supp_TableS1.pdf]

**Table S1.** Continence grade, failed repairs, and urinary retention at discharge and follow-up (n=346)

| <b>Continence grade at discharge</b> | <b>Total n (%)</b> | <b>Continence grade improved at follow-up n (%)</b> | <b>Continence grade unchanged at follow-up n (%)</b> | <b>Continence grade worse at follow-up n (%)</b> |
|--------------------------------------|--------------------|-----------------------------------------------------|------------------------------------------------------|--------------------------------------------------|
| 1                                    | 247 (71.4)         | 0 (0.0)                                             | 230 (93.1)                                           | 17 (6.9)                                         |
| 2                                    | 43 (12.4)          | 29 (67.4)                                           | 4 (9.3)                                              | 10 (23.3)                                        |
| 3                                    | 23 (6.7)           | 7 (30.4)                                            | 13 (56.5)                                            | 3 (13.0)                                         |
| 4                                    | 14 (4.1)           | 9 (64.3)                                            | 3 (21.4)                                             | 2 (14.3)                                         |
| 5                                    | 6 (1.7)            | 4 (66.7)                                            | 2 (33.3)                                             | 0 (0.0)                                          |
| Missing                              | 13 (3.8)           | 0 (0.0)                                             | 0 (0.0)                                              | 0 (0.0)                                          |
