# Supplementary material
Source: PubMed Central journal article supplement (PMC5400709)

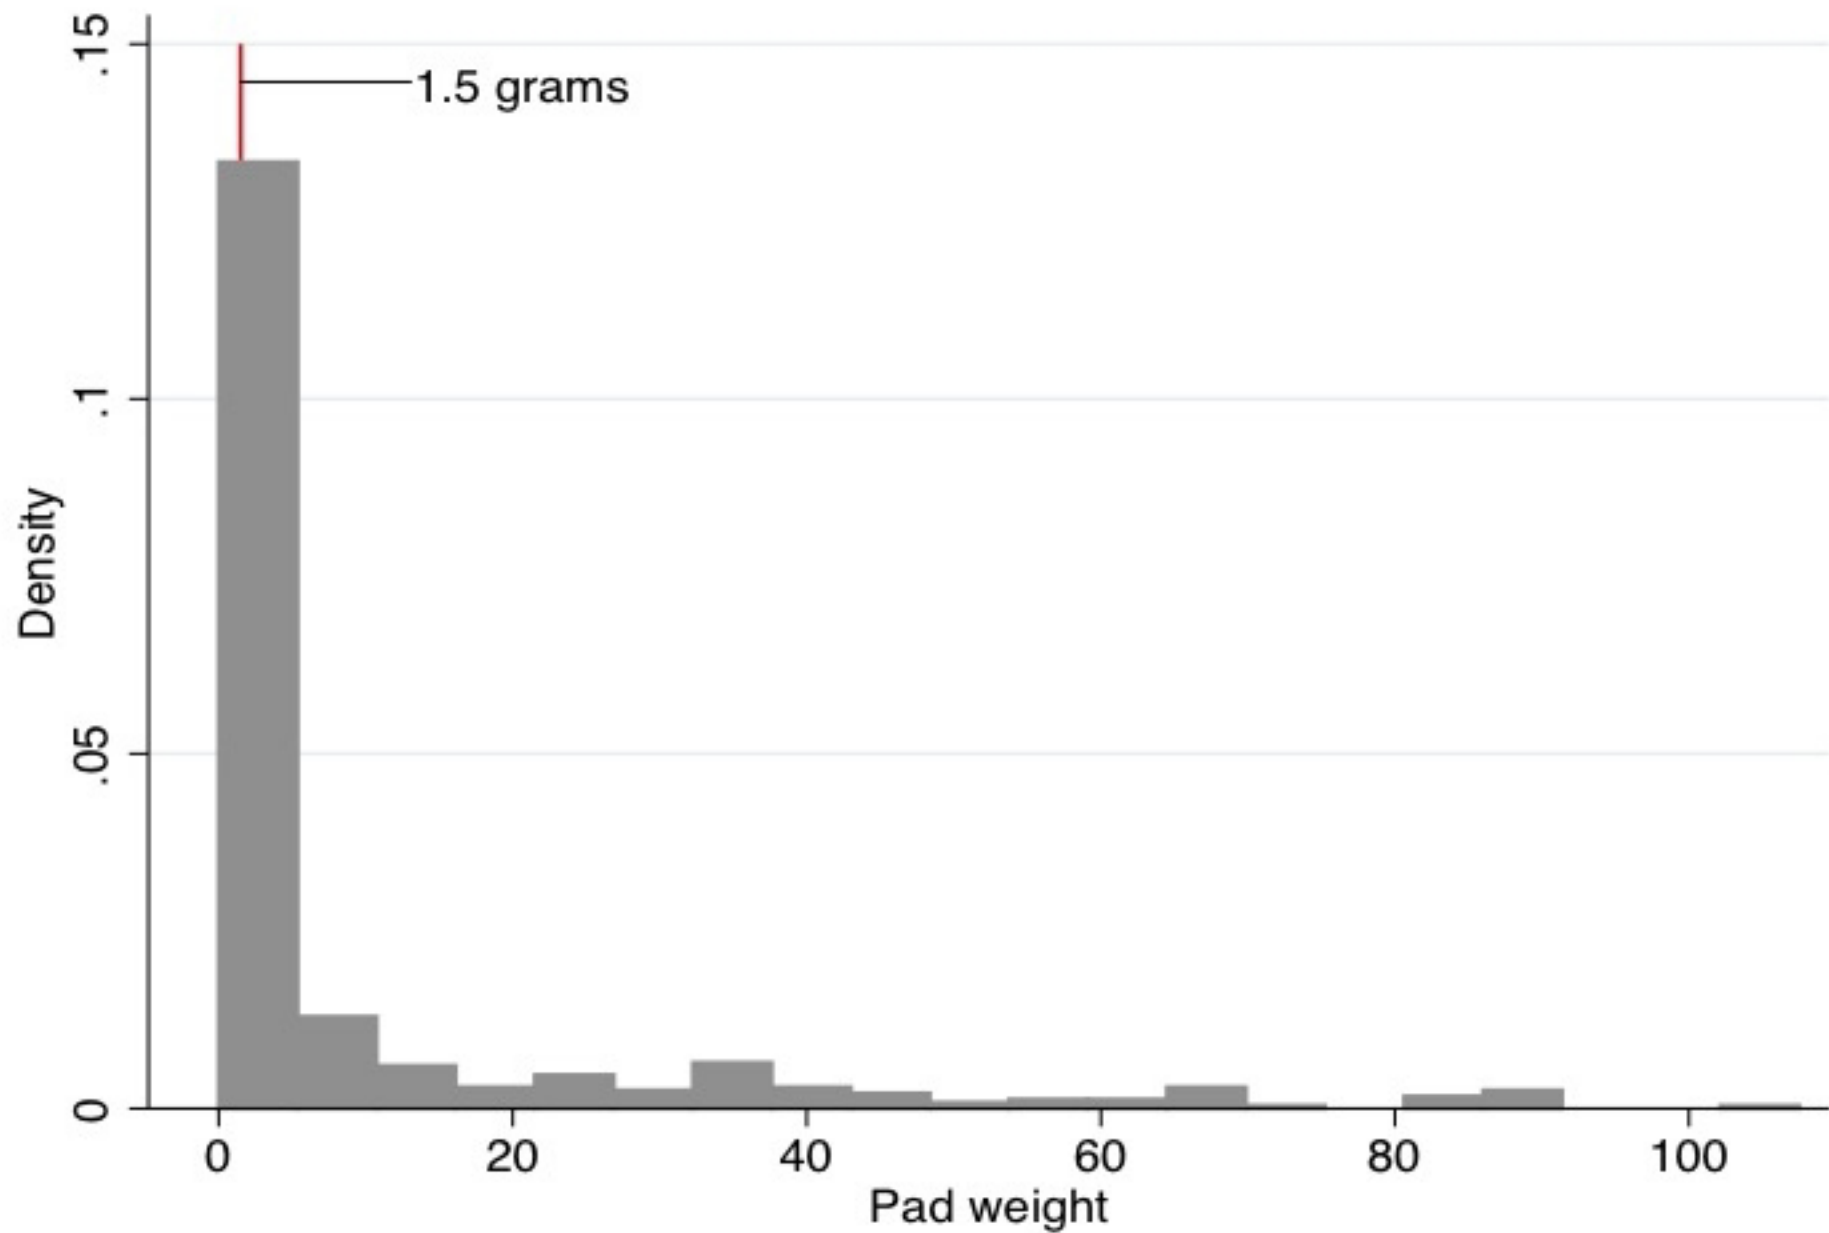

Figure S1: Distribution of the weights of post-operative 1-hour pad testing

Supplement: NIHMS832619-supplement-Supp_Fig_S1.pdf [file NIHMS832619-supplement-Supp_Fig_S1.pdf]
